RESEARCH ARTICLE

# Exploring the risk association between psoriasis and chronic obstructive pulmonary disease, and asthma using the NHIS database

Mingyu Liu<sup>1</sup>, Shuming Ji<sup>2</sup>, Pengxin Ye<sup>3</sup>, Min Gong<sup>3</sup>, Qilin Liu<sup>3\*</sup>

**1** Department of Equipment, West China Hospital of Sichuan University, Chengdu, China, **2** Department of Clinical Research Management, West China Hospital of Sichuan University, Chengdu, China, **3** Department of Equipment, West China Hospital of Sichuan University, Chengdu, China

\* [hxlq@wchscu.cn](mailto:hxlq@wchscu.cn)

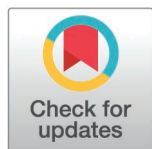

**OPEN ACCESS**

**Citation:** Liu M, Ji S, Ye P, Gong M, Liu Q (2026) Exploring the risk association between psoriasis and chronic obstructive pulmonary disease, and asthma using the NHIS database. PLoS One 21(2): e0342015. <https://doi.org/10.1371/journal.pone.0342015>

**Editor:** Emanuele Scala, Istituto Dermatologico dell'Immacolata (IDI)-IRCCS, ITALY

**Received:** May 6, 2025

**Accepted:** January 15, 2026

**Published:** February 13, 2026

**Copyright:** © 2026 Liu et al. This is an open access article distributed under the terms of the [Creative Commons Attribution License](https://creativecommons.org/licenses/by/4.0/), which permits unrestricted use, distribution, and reproduction in any medium, provided the original author and source are credited.

**Data availability statement:** The datasets analysed in this study are available in the NHIS (<https://www.cdc.gov/nchs/nhis/index.html>).

**Funding:** The author(s) received no specific funding for this work.

## Abstract

### Background

Asthma (AS) and chronic obstructive pulmonary disease (COPD) are prevalent chronic airway disorders with shared inflammatory pathways. Considering the systemic inflammatory nature of psoriasis, this study utilized the National Health Interview Survey (NHIS) to investigate its potential association with COPD and AS.

### Methods

Data from the 2023 NHIS were analyzed, with participants selected based on specific inclusion criteria. A baseline table was constructed, and multivariate logistic regression models, along with risk stratification analysis, were employed to examine the correlations between psoriasis and COPD and AS. Receiver operating characteristic (ROC) analysis was conducted to assess the predictive value for both conditions.

### Results

A total of 27,106 participants were included in the study. Significant differences were observed in the baseline characteristics of psoriasis, age, race, region, gender, education, marital status, employment, income, smoking habits, health status, mental health, disability, heart attack history, BMI, prediabetes, cancer, hypertension, hypercholesterolemia, arthritis, coronary heart disease, stroke, health insurance, anxiety, and depression ( $P < 0.001$ ). Multivariate logistic regression revealed a strong association between psoriasis and COPD (model 1: OR 2.63, 95% CI: 2.13–3.23,  $P < 0.001$ ; model 2: OR 2.43, 95% CI: 1.95–2.99,  $P < 0.001$ ; model 3: OR 1.54, 95% CI: 1.21–1.96,  $P < 0.001$ ). A similar association was found between psoriasis and AS (model 1: OR 1.68, 95% CI: 1.42–1.97,  $P < 0.001$ ; model 2: OR 1.74, 95% CI: 1.47–2.05,  $P < 0.001$ ; model 3: OR 1.32, 95% CI: 1.11–1.56,  $P < 0.01$ ). The ROC analysis based

**Competing interests:** The authors have declared that no competing interests exist.

on model 3 demonstrated substantial predictive power of psoriasis for COPD, with an AUC of 0.881.

## Conclusion

Psoriasis was identified to have a strong association with COPD and AS, which provided valuable insights into understanding the pathogenesis of these diseases.

## 1. Introduction

Chronic obstructive pulmonary disease (COPD) and asthma (AS) are highly prevalent chronic respiratory diseases worldwide. Due to their distinct pathophysiological mechanisms and clinical manifestations, they have long been subjects of extensive attention in clinical practice and scientific research. COPD ranks as the second most common respiratory disease globally, characterized by persistent airflow limitation primarily associated with oxidative damage and airway remodeling triggered by exposure to tobacco smoke and harmful particulate matter [1,2]. AS is characterized by reversible airflow limitation, increased mucus secretion, and airway hyperresponsiveness, often triggered by allergens such as pollen or cold air [3]. There are also differences in the clinical treatment methods of the two: the current COPD treatment is mainly oxygen therapy, non-invasive ventilation, pulmonary rehabilitation and bronchodilators (such as LAMA/LABA) [4,5]; Conventional clinical treatment of AS still focuses on alleviating bronchial contraction [6]. However, despite the differences between the two, it is found in clinical practice that COPD and asthma often overlap (such as chronic cough, wheezing), and comorbidities are particularly prominent in smokers or obese people [7]. This shows that although COPD and AS are significantly different, the overlapping clinical symptoms and comorbidities of the two highlight the necessity of exploring their potential common drivers.

Psoriasis is a chronic systemic inflammatory disease, and its onset is closely related to the activation of Th1/Th17 cells and the inflammatory response mediated by cytokines such as IFN- $\gamma$ , TNF- $\alpha$ , and IL-17 [8]. These inflammatory pathways also happen to be involved in the progression of COPD and AS [9,10]. Existing studies have initially suggested an association between psoriasis and respiratory diseases, such as the NHANES 2009–2014 data showing a 67% increased risk of AS in patients with psoriasis [11]. However, these studies focus more on single airway diseases, and lack a joint analysis of two representative chronic airway diseases, COPD and AS, and it is difficult to fully reveal the correlation pattern of psoriasis and different types of airway diseases.

The National Health Interview Survey (NHIS) is an annual health survey conducted by the National Center for Health Statistics (NCHS) under the Centers for Disease Control and Prevention (CDC). As an authoritative source of information reflecting the health and well-being of the U.S. population, the survey covers areas including demographic information, health status, healthcare utilization, health insurance coverage, disability status, and work-related health issues [12,13]. Therefore, this study utilizes the 2023 NHIS database to systematically evaluate the association between

psoriasis and COPD/AS through a multivariable logistic regression model and risk stratification analysis, exploring its predictive value to provide new insights for managing chronic airway diseases.

## 2. Materials and methods

### 2.1. Data acquisition

The NHIS (<https://www.cdc.gov/nchs/nhis/index.html>) is an annual cross-sectional survey that collects health-related data from a nationally representative sample of civilian, non-institutionalized residents in the United States. In this study, COPD and AS were considered the outcome, with psoriasis as the exposure factors. Covariates such as sociodemographic characteristics, health status, comorbidities, and insurance coverage were also included in the analysis. A total of 29,522 participants from the 2023 NHIS dataset were initially considered. Inclusion criteria were as follows: 1) Adults aged 18 years or older; 2) Participants who responded with “Yes” and provided clear and complete diagnostic information; 3) Participants who completed all covariate information and did not refuse to answer or indicate responses as “unknown”. To further ensure no missing values in all analytical variables and guarantee data quality, during the data preprocessing stage, this study used the complete case analysis method to handle missing data. Specifically, samples with any missing values (NA) in the dataset were excluded, and only complete records with no missing values in all variables were retained. To further ensure the absence of missing values in all analytical variables and guarantee data quality, this study employed a missing proportion analysis method to handle missing data during the data preprocessing stage. Finally, after excluding samples with missing values and merging data of asthma and COPD cases, 27,106 eligible participants were identified and included in subsequent analyses (Fig 1).

### 2.2. Definition of outcome

Data for 2023, along with the Sample Adult Interview, were selected from the NHIS database. The codebook was reviewed, and COPDEV\_A was queried: “Has a doctor or healthcare professional ever diagnosed you with COPD, emphysema, or chronic bronchitis?” Participants who answered “Yes” were categorized as having COPD, while those who responded “No” were classified as not having COPD. Similarly, the codebook was queried for ASEV\_A: “Has a doctor or

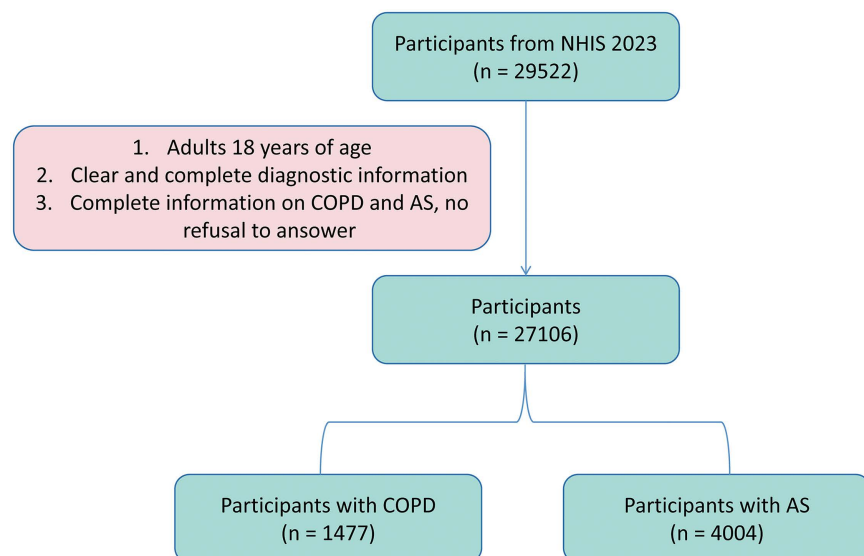

**Fig 1. Process diagram for inclusion of research subjects.**

<https://doi.org/10.1371/journal.pone.0342015.g001>

healthcare professional ever diagnosed you with asthma?” Participants who answered “Yes” were classified as having AS, while those who answered “No” were classified as not having AS.

### 2.3. Definition of exposure factor

To identify participants with psoriasis, the 2023 data and Sample Adult Interview were selected from the NHIS database. The codebook was accessed, and PSOREV\_A was searched: “Have you ever been told by a doctor or other health professional that you had psoriasis?” Participants answering “Yes” were classified as having psoriasis, while those answering “No” were classified as not having psoriasis.

### 2.4. Definition of covariates

Several covariates were considered in this study, including age, race, region, gender, education, marital status, employment, income, smoking, health status, mental health, disability, heart attack, body mass index (BMI), prediabetes, cancer, hypertension, high cholesterol, arthritis, coronary heart disease, stroke, health insurance, anxiety, and depression [12,14–16]. Age was divided into five groups:  $\geq 65$ , 50–64, 40–49, 18–29, and 30–39 years. Race was categorized into three groups: Hispanic (all other groups), Hispanic (Mexican/Mexican American), and Not Hispanic. Gender was divided into two categories: male and female. Education was classified into three categories: more than high school graduate, high school graduate, and less than high school graduate. Marital status was categorized into three groups: living with a partner, married, and neither. Income was divided into three categories: middle and high income, nearly poor, and poor. Smoking status was divided into four groups: every day, former smoker, never smoked, and some days. Region was categorized into four groups: West, Midwest, South, and Northeast. Health status was categorized into five groups: excellent, fair, good, poor, and very good. BMI was divided into four groups: healthy weight, obese, overweight, and underweight. Other covariates, such as employment, mental health, disability, heart attack, prediabetes, cancer, hypertension, high cholesterol, arthritis, coronary heart disease, stroke, health insurance, anxiety, and depression, were grouped as “Yes” or “No.” The covariate identifiers are provided in [S1 Table](#).

### 2.5. Construction of the baseline table and risk association analysis

Chi-square test and t-test were used to compare differences in exposure factors and covariates among the control, COPD, AS, and combined COPD and AS groups. A baseline table was constructed using the `tableone` package (v 0.13.2) with a significance level set at  $P < 0.05$  [17]. To examine the relationship between the exposure factors and outcomes, multivariate logistic regression models were developed. Model 1 assessed the association between exposure factors and outcomes without adjusting for covariates. Model 2 incorporated race, age, and gender as adjustments to Model 1. Model 3 further included region, education, marital status, employment, income, smoking, health status, mental health, disability, heart attack, BMI, prediabetes, cancer, hypertension, high cholesterol, arthritis, coronary heart disease, stroke, health insurance, anxiety, and depression. Odds ratios (OR), 95% confidence intervals (CI), and  $P$ -values were calculated to determine the strength of the associations. Logistic regression was performed separately for COPD and AS as outcomes. Meanwhile, goodness-of-fit tests and explanatory power index analyses were conducted for the three models, with the calculation of each model’s akaike information criterion (AIC) value, Nagelkerke  $R^2$  value, area under the curve (AUC) value, and Hosmer-Lemeshow (HL) test  $P$ -value.

To avoid potential bias caused by multicollinearity among covariates in Model 3 and ensure the reliability of regression results, we conducted a multicollinearity diagnosis. We used the `vif` function in the R package “`car`” (v 3.1.2) (<https://socialsciences.mcmaster.ca/jfox/Books/Companion/>) to calculate the Variance Inflation Factor (VIF) for Model 3 of both Asthma and COPD, which was applied to diagnose multicollinearity. Among the diagnostic criteria,  $VIF < 5$  indicated no significant multicollinearity,  $VIF > 5$  indicated strong multicollinearity, and  $VIF > 10$  was considered severe multicollinearity.

To explore the influence of different covariates and exposure factors on COPD and AS across subgroups, risk stratification analysis was conducted based on Model 3. First, the regression coefficients of each independent variable (including psoriasis and all covariates in Model 3) were extracted using the `glmnet` package (v 4.4.1) with  $P < 0.05$  [18]. This coefficient was essentially the log-odds, reflecting the logarithmic effect of the variable on the risk of the outcome (COPD or AS). Second, the extracted log-odds were exponentiated to yield the corresponding odds ratio (OR), which intuitively demonstrated the magnitude of the variable's impact on the outcome risk. Subsequently, the 95% confidence interval (95% CI) for the log-odds was calculated using the `confint()` function in base R, and this interval was exponentiated to obtain the 95% CI for the OR, so as to verify the statistical reliability of the risk estimation. Finally, the `forestplot` package (v 3.1.1) was used to visualize the OR values and 95% CIs of all variables through forest plots [14].

## 2.6. Smooth curve fitting and receiver operating characteristic (ROC) analysis

To assess the nonlinear relationship between psoriasis and COPD, as well as between psoriasis and AS, Model 1 was used for adjustments, and the LOESS method was applied to plot smooth curves to validate these relationships.

In addition, to evaluate the predictive value of psoriasis for COPD and AS, this study conducted receiver operating characteristic (ROC) analysis based on Model 3, which included all pre-specified covariates and exposure factors. The specific procedures were as follows: Using the `pROC` package (v 6.0.93) [15] in R software, we implemented the `roc()` function with the predicted probabilities from Model 3 as the independent variable and the disease status (COPD/AS) as the dependent variable. This generated ROC curves and calculated the area under the curve (AUC). An AUC value exceeding 0.7 indicated that the model demonstrated satisfactory predictive performance for the outcomes.

## 2.7. Statistical analysis

A two-tailed  $P$ -value  $< 0.05$  was considered statistically significant for all analyses in this study. Specific statistical tests were applied as follows: for the construction of the baseline table, the chi-square test was used to compare differences in exposure factors and covariates among the control group, COPD group, AS group, and the group with both COPD and AS; for the multivariate logistic regression models and risk stratification analysis based on the `glmnet` package, the Wald test was used to calculate two-tailed  $P$ -values, so as to assess the statistical significance of the associations between variables and the effects of each variable in subgroup analyses.

All bioinformatics analyses and result visualizations were performed using R software (version 4.2.2), which covered the entire analytical workflow, including: data import and cleaning of the 2023 NHIS dataset; construction of the baseline table via the `tableone` package (v 0.13.2); performance of multivariate logistic regression analysis; conduction of risk stratification analysis via the `glmnet` package (v 4.4.1); implementation of ROC analysis via the `pROC` package (v 6.0.93); generation of forest plots via the `forestplot` package (v 3.1.1); and creation of smooth curves via the LOESS method.

Furthermore, a statistical power analysis was performed for all samples to evaluate the ability of the current sample size to detect the observed effect sizes in the research on asthma and COPD. This analysis employed a post-hoc power analysis approach, encompassing 25 effect levels across 13 predictors.

## 3. Results

### 3.1. Psoriasis showed a highly significant difference among the control group, COPD group, AS group, and the group with both COPD and AS

After excluding samples with missing values, 27,127 participants were included, accounting for 91.9% of the original sample size. All variables maintained low missing proportions, indicating good data quality. Specifically, the missing rates of region, race, disability status, and gender were 0%. Employment status had the highest missing proportion at 4.3% (S1A Fig). Subsequently, data of asthma and COPD cases were merged, and a total of 27,106 participants were included in subsequent analyses.

In this study, 27,106 participants were enrolled and divided into a control group (22,213 cases), a COPD group (889 cases), an asthma group (3,416 cases), and a COPD combined with AS group (588 cases). Significant differences ( $P < 0.05$ ) were observed among the four groups in terms of demographic characteristics and covariate distributions. The COPD group predominantly consisted of elderly individuals (67.4% aged  $\geq 65$  years), females (53.7%), and non-Hispanic whites (96.1%), with significantly higher prevalence rates of hypertension, hypercholesterolemia, and arthritis compared to the other groups ( $P < 0.05$ ). The asthma group had a wider age distribution (24.7% aged  $\geq 65$  years) and a higher proportion of obesity (41.3%), suggesting that metabolic factors might be involved in disease development. Notably, the prevalence of psoriasis in the COPD combined with AS group (9.4%) was higher than that in the control group (2.8%), initially indicating a potential association with respiratory diseases ([Table 1](#)).

### 3.2. Psoriasis shows significant associations with COPD and AS

Multivariate logistic regression analysis demonstrated that psoriasis was significantly associated with COPD and AS) and the effect sizes remained statistically significant after adjusting for different covariates ([Table 2](#)). In Model 1, which did not adjust for any covariates, the association between psoriasis and COPD was the strongest (OR = 2.633, 95% CI: 2.130–3.225,  $P < 0.001$ ). After incorporating demographic variables (Model 2) and all covariates in the full model (Model 3), the OR value decreased to 1.544 (95% CI: 1.210–1.956,  $P < 0.001$ ), yet it still retained statistical significance. Furthermore, Model 3 exhibited a discriminative ability with an AUC of 0.881 and a model explanatory power (Nagelkerke  $R^2$ ) of 0.3293, indicating that the model could effectively distinguish between COPD cases and non-cases. Additionally, all models demonstrated good goodness-of-fit, as evidenced by the HL test with  $P > 0.05$ .

Similarly, in Model 3, the risk effect of psoriasis on asthma was an OR of 1.319 (95% CI: 1.109–1.561,  $P = 0.0015$ ), indicating that although its impact was weaker than that on COPD, it still held clinical significance. From Model 1 to Model 3, the Nagelkerke  $R^2$  gradually increased from 0.0023 in Model 1 to 0.0827 in Model 3, and the discriminative ability (AUC) improved from nearly random 0.509 to acceptable 0.670. The goodness-of-fit test indicated that the fully adjusted model (Model 3) exhibited a good fit, as evidenced by the HL test with  $P > 0.05$ .

Additionally, the stability of Model 3 was validated through multicollinearity diagnosis. The results showed that in Model 3 corresponding to COPD and AS, the variance inflation factors (VIFs) of all covariates were less than 5, confirming the absence of significant multicollinearity among the covariates and ensuring the reliability of the regression results ([S2 Table](#)).

Risk stratification analysis further revealed a significant association between psoriasis and the onset of COPD (OR: 1.54, 95% CI: 1.21–1.96,  $P < 0.001$ ). Additional risk factors for COPD included female gender, race (not Hispanic), income (nearly poor and poor), health status (fair, good, poor, and very good), disability, BMI (obese and underweight), cancer, arthritis, coronary heart disease, and anxiety (OR  $> 1$ ,  $P < 0.05$ ) ([Fig 2A](#)). Similarly, risk stratification analysis demonstrated a significant association between psoriasis and AS onset (OR: 1.32, 95% CI: 1.11–1.56,  $P < 0.01$ ). Other risk factors for AS included age (18–29, 30–39, 40–49, and 50–64), education (more than high school graduate), income (poor), region (Northeast and West), health status (fair, good, poor, and very good), disability, BMI (obese and overweight), prediabetes, arthritis, anxiety, and depression (OR  $> 1$ ,  $P < 0.05$ ) ([Fig 2B](#)).

### 3.3. High statistical power

Post-hoc power analysis revealed that for asthma, 19 effects (e.g., covariates such as age, smoking status, and BMI) exhibited high statistical power (power  $\geq 80\%$ ), 2 effects showed moderate power (power = 50–80%), and 4 effects had insufficient power (power  $< 50\%$ ). Specifically, the detection power for small effects with an OR of 1.2 reached 100%, while the power for moderate effects (OR = 1.5) and large effects (OR = 2.0) was also 100%. These results indicated that the sample size was sufficient for analyzing the vast majority of effects, enabling stable detection of their associations with asthma and minimizing the risk of type II error (missing true effects) ([S1B Fig](#)).

**Table 1. Baseline feature analysis of research subjects.**

|                    | level                               | Stratified by COPD: Asthma |            |             |             | p       |
|--------------------|-------------------------------------|----------------------------|------------|-------------|-------------|---------|
|                    |                                     | control                    | COPD       | AS          | COPD and AS |         |
| n                  |                                     | 22213                      | 889        | 3416        | 588         |         |
| Age (%)            | ≥ 65                                | 7354 (33.1)                | 599 (67.4) | 844 (24.7)  | 315 (53.6)  | < 0.001 |
|                    | 18-29                               | 2647 (11.9)                | 9 (1.0)    | 648 (19.0)  | 5 (0.9)     |         |
|                    | 30-39                               | 3603 (16.2)                | 17 (1.9)   | 666 (19.5)  | 24 (4.1)    |         |
|                    | 40-49                               | 3208 (14.4)                | 44 (4.9)   | 500 (14.6)  | 46 (7.8)    |         |
|                    | 50-64                               | 5401 (24.3)                | 220 (24.7) | 758 (22.2)  | 198 (33.7)  |         |
| Gender (%)         | Female                              | 11714 (52.7)               | 477 (53.7) | 2016 (59.0) | 386 (65.6)  | < 0.001 |
|                    | Male                                | 10499 (47.3)               | 412 (46.3) | 1400 (41.0) | 202 (34.4)  |         |
| Race (%)           | Hispanic (all other groups)         | 1472 (6.6)                 | 17 (1.9)   | 252 (7.4)   | 27 (4.6)    | < 0.001 |
|                    | Hispanic (Mexican/Mexican American) | 1947 (8.8)                 | 18 (2.0)   | 221 (6.5)   | 18 (3.1)    |         |
|                    | Not Hispanic                        | 18794 (84.6)               | 854 (96.1) | 2943 (86.2) | 543 (92.3)  |         |
| Education (%)      | High School Grad                    | 5540 (24.9)                | 328 (36.9) | 796 (23.3)  | 167 (28.4)  | < 0.001 |
|                    | Less Than High School Grad          | 1819 (8.2)                 | 143 (16.1) | 215 (6.3)   | 92 (15.6)   |         |
|                    | More Than High School Grad          | 14854 (66.9)               | 418 (47.0) | 2405 (70.4) | 329 (56.0)  |         |
| Marital_Status (%) | Living with partner                 | 1452 (6.5)                 | 34 (3.8)   | 294 (8.6)   | 33 (5.6)    | < 0.001 |
|                    | Married                             | 10588 (47.7)               | 300 (33.7) | 1393 (40.8) | 194 (33.0)  |         |
|                    | Neither                             | 10173 (45.8)               | 555 (62.4) | 1729 (50.6) | 361 (61.4)  |         |
| Employment (%)     | No                                  | 9445 (42.5)                | 721 (81.1) | 1378 (40.3) | 446 (75.9)  | < 0.001 |
|                    | Yes                                 | 12768 (57.5)               | 168 (18.9) | 2038 (59.7) | 142 (24.1)  |         |
| Income (%)         | Middle and high income              | 16324 (73.5)               | 475 (53.4) | 2410 (70.6) | 269 (45.7)  | < 0.001 |
|                    | Nearly poor                         | 3854 (17.4)                | 252 (28.3) | 613 (17.9)  | 186 (31.6)  |         |
|                    | poor                                | 2035 (9.2)                 | 162 (18.2) | 393 (11.5)  | 133 (22.6)  |         |
| Smoking (%)        | every day                           | 1587 (7.1)                 | 254 (28.6) | 250 (7.3)   | 126 (21.4)  | < 0.001 |
|                    | Former                              | 5425 (24.4)                | 441 (49.6) | 817 (23.9)  | 249 (42.3)  |         |
|                    | Never                               | 14615 (65.8)               | 161 (18.1) | 2256 (66.0) | 183 (31.1)  |         |
|                    | some day                            | 586 (2.6)                  | 33 (3.7)   | 93 (2.7)    | 30 (5.1)    |         |
| Region (%)         | Midwest                             | 4873 (21.9)                | 229 (25.8) | 744 (21.8)  | 130 (22.1)  | < 0.001 |
|                    | Northeast                           | 3385 (15.2)                | 118 (13.3) | 561 (16.4)  | 101 (17.2)  |         |
|                    | South                               | 8300 (37.4)                | 373 (42.0) | 1191 (34.9) | 227 (38.6)  |         |
|                    | West                                | 5655 (25.5)                | 169 (19.0) | 920 (26.9)  | 130 (22.1)  |         |
| Health (%)         | Excellent                           | 5031 (22.6)                | 31 (3.5)   | 519 (15.2)  | 15 (2.6)    | < 0.001 |
|                    | Fair                                | 2369 (10.7)                | 279 (31.4) | 490 (14.3)  | 210 (35.7)  |         |
|                    | Good                                | 6417 (28.9)                | 301 (33.9) | 1085 (31.8) | 167 (28.4)  |         |
|                    | Poor                                | 552 (2.5)                  | 154 (17.3) | 138 (4.0)   | 120 (20.4)  |         |
|                    | Very Good                           | 7844 (35.3)                | 124 (13.9) | 1184 (34.7) | 76 (12.9)   |         |
| Mental (%)         | No                                  | 19550 (88.0)               | 758 (85.3) | 2716 (79.5) | 471 (80.1)  | < 0.001 |
|                    | Yes                                 | 2663 (12.0)                | 131 (14.7) | 700 (20.5)  | 117 (19.9)  |         |
| Disability (%)     | No                                  | 20317 (91.5)               | 597 (67.2) | 3004 (87.9) | 348 (59.2)  | < 0.001 |
|                    | Yes                                 | 1896 (8.5)                 | 292 (32.8) | 412 (12.1)  | 240 (40.8)  |         |
| BMI (%)            | Healthy weight                      | 7031 (31.7)                | 251 (28.2) | 882 (25.8)  | 113 (19.2)  | < 0.001 |
|                    | Obese                               | 7046 (31.7)                | 325 (36.6) | 1411 (41.3) | 288 (49.0)  |         |
|                    | Overweight                          | 7811 (35.2)                | 269 (30.3) | 1081 (31.6) | 177 (30.1)  |         |
|                    | Underweight                         | 325 (1.5)                  | 44 (4.9)   | 42 (1.2)    | 10 (1.7)    |         |
| Heart_attack (%)   | No                                  | 21509 (96.8)               | 744 (83.7) | 3323 (97.3) | 523 (88.9)  | < 0.001 |
|                    | Yes                                 | 704 (3.2)                  | 145 (16.3) | 93 (2.7)    | 65 (11.1)   |         |

(Continued)

**Table 1.** (Continued)

|                            | level | Stratified by COPD: Asthma |            |             |             | p       |
|----------------------------|-------|----------------------------|------------|-------------|-------------|---------|
|                            |       | control                    | COPD       | AS          | COPD and AS |         |
| Prediabetes (%)            | No    | 18590 (83.7)               | 624 (70.2) | 2709 (79.3) | 370 (62.9)  | < 0.001 |
|                            | Yes   | 3623 (16.3)                | 265 (29.8) | 707 (20.7)  | 218 (37.1)  |         |
| Cancer (%)                 | No    | 19504 (87.8)               | 623 (70.1) | 3029 (88.7) | 451 (76.7)  | < 0.001 |
|                            | Yes   | 2709 (12.2)                | 266 (29.9) | 387 (11.3)  | 137 (23.3)  |         |
| Hypertension (%)           | No    | 14228 (64.1)               | 316 (35.5) | 2154 (63.1) | 201 (34.2)  | < 0.001 |
|                            | Yes   | 7985 (35.9)                | 573 (64.5) | 1262 (36.9) | 387 (65.8)  |         |
| High_cholesterol (%)       | No    | 15203 (68.4)               | 395 (44.4) | 2369 (69.4) | 244 (41.5)  | < 0.001 |
|                            | Yes   | 7010 (31.6)                | 494 (55.6) | 1047 (30.6) | 344 (58.5)  |         |
| Arthritis (%)              | No    | 17017 (76.6)               | 357 (40.2) | 2438 (71.4) | 178 (30.3)  | < 0.001 |
|                            | Yes   | 5196 (23.4)                | 532 (59.8) | 978 (28.6)  | 410 (69.7)  |         |
| Coronary_heart_disease (%) | No    | 21009 (94.6)               | 678 (76.3) | 3249 (95.1) | 474 (80.6)  | < 0.001 |
|                            | Yes   | 1204 (5.4)                 | 211 (23.7) | 167 (4.9)   | 114 (19.4)  |         |
| Stroke (%)                 | No    | 21492 (96.8)               | 793 (89.2) | 3303 (96.7) | 506 (86.1)  | < 0.001 |
|                            | Yes   | 721 (3.2)                  | 96 (10.8)  | 113 (3.3)   | 82 (13.9)   |         |
| Health_Insurance (%)       | No    | 20616 (92.8)               | 857 (96.4) | 3251 (95.2) | 569 (96.8)  | < 0.001 |
|                            | Yes   | 1597 (7.2)                 | 32 (3.6)   | 165 (4.8)   | 19 (3.2)    |         |
| Anxiety (%)                | No    | 18730 (84.3)               | 623 (70.1) | 2407 (70.5) | 331 (56.3)  | < 0.001 |
|                            | Yes   | 3483 (15.7)                | 266 (29.9) | 1009 (29.5) | 257 (43.7)  |         |
| Depression (%)             | No    | 18508 (83.3)               | 591 (66.5) | 2381 (69.7) | 297 (50.5)  | < 0.001 |
|                            | Yes   | 3705 (16.7)                | 298 (33.5) | 1035 (30.3) | 291 (49.5)  |         |
| Psoriasis (%)              | No    | 21591 (97.2)               | 834 (93.8) | 3278 (96.0) | 533 (90.6)  | < 0.001 |
|                            | Yes   | 622 (2.8)                  | 55 (6.2)   | 138 (4.0)   | 55 (9.4)    |         |

<https://doi.org/10.1371/journal.pone.0342015.t001>

**Table 2. Risk association analysis of psoriasis with COPD and AS.**

| Disease | Model                        | OR_95 CI            | P_value | AIC     | Nagelkerke_R2 | AUC   | HL_P   |
|---------|------------------------------|---------------------|---------|---------|---------------|-------|--------|
| Asthma  | Model 1 (Crude)              | 1.677 (1.421-1.971) | <0.001  | 22669   | 0.0023        | 0.509 | 1      |
| Asthma  | Model 2 (Partially adjusted) | 1.741 (1.473-2.048) | <0.001  | 22455.8 | 0.017         | 0.576 | 0.0031 |
| Asthma  | Model 3 (Fully adjusted)     | 1.319 (1.109-1.561) | 0.0015  | 21482.5 | 0.0827        | 0.67  | 0.5172 |
| COPD    | Model 1 (Crude)              | 2.633 (2.130-3.225) | <0.001  | 11403.6 | 0.0072        | 0.522 | 1      |
| COPD    | Model 2 (Partially adjusted) | 2.426 (1.952-2.990) | <0.001  | 10441.2 | 0.1095        | 0.729 | 0.9596 |
| COPD    | Model 3 (Fully adjusted)     | 1.544 (1.210-1.956) | <0.001  | 8282.6  | 0.3293        | 0.881 | 0.1113 |

<https://doi.org/10.1371/journal.pone.0342015.t002>

For COPD, the statistical power was even more robust: 24 effects demonstrated high statistical power (power  $\geq$  80%), with only 1 effect showing insufficient power and no effects classified as moderate power. The detection power for effects with an OR of 1.2 was 94.4%, and for OR values of 1.5 and 2.0, the power reached 100% (S1C Fig).

Collectively, the included sample size of 27,106 met the statistical power requirements for epidemiological studies.

### 3.4. Psoriasis had good predictive value for COPD

Psoriasis was positively correlated with the prevalence of both COPD and AS (Fig 3A, B). ROC analysis based on Model 3 revealed that this model had a substantial predictive value for COPD, with an AUC of 0.881 (Fig 3C). In contrast, the model demonstrated limited predictive value for AS, with an AUC of 0.670 (Fig 3D).

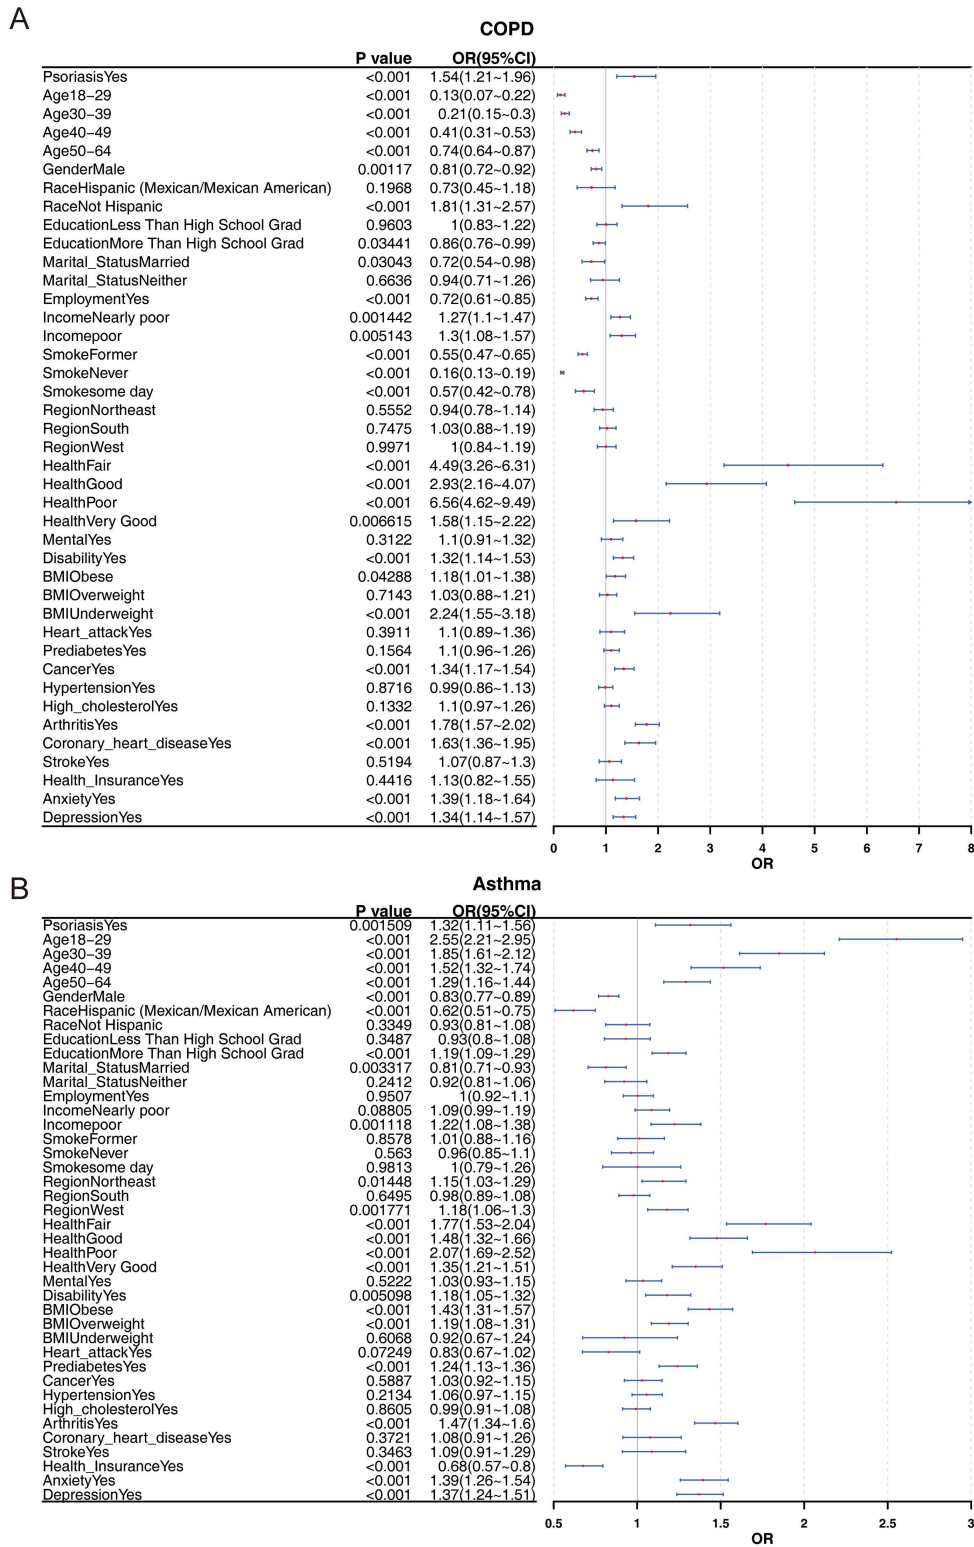

**Fig 2. Risk correlation between COPD, AS, and psoriasis: (A) risk stratification analysis for psoriasis and COPD, and (B) risk stratification analysis for psoriasis and AS.**

<https://doi.org/10.1371/journal.pone.0342015.g002>

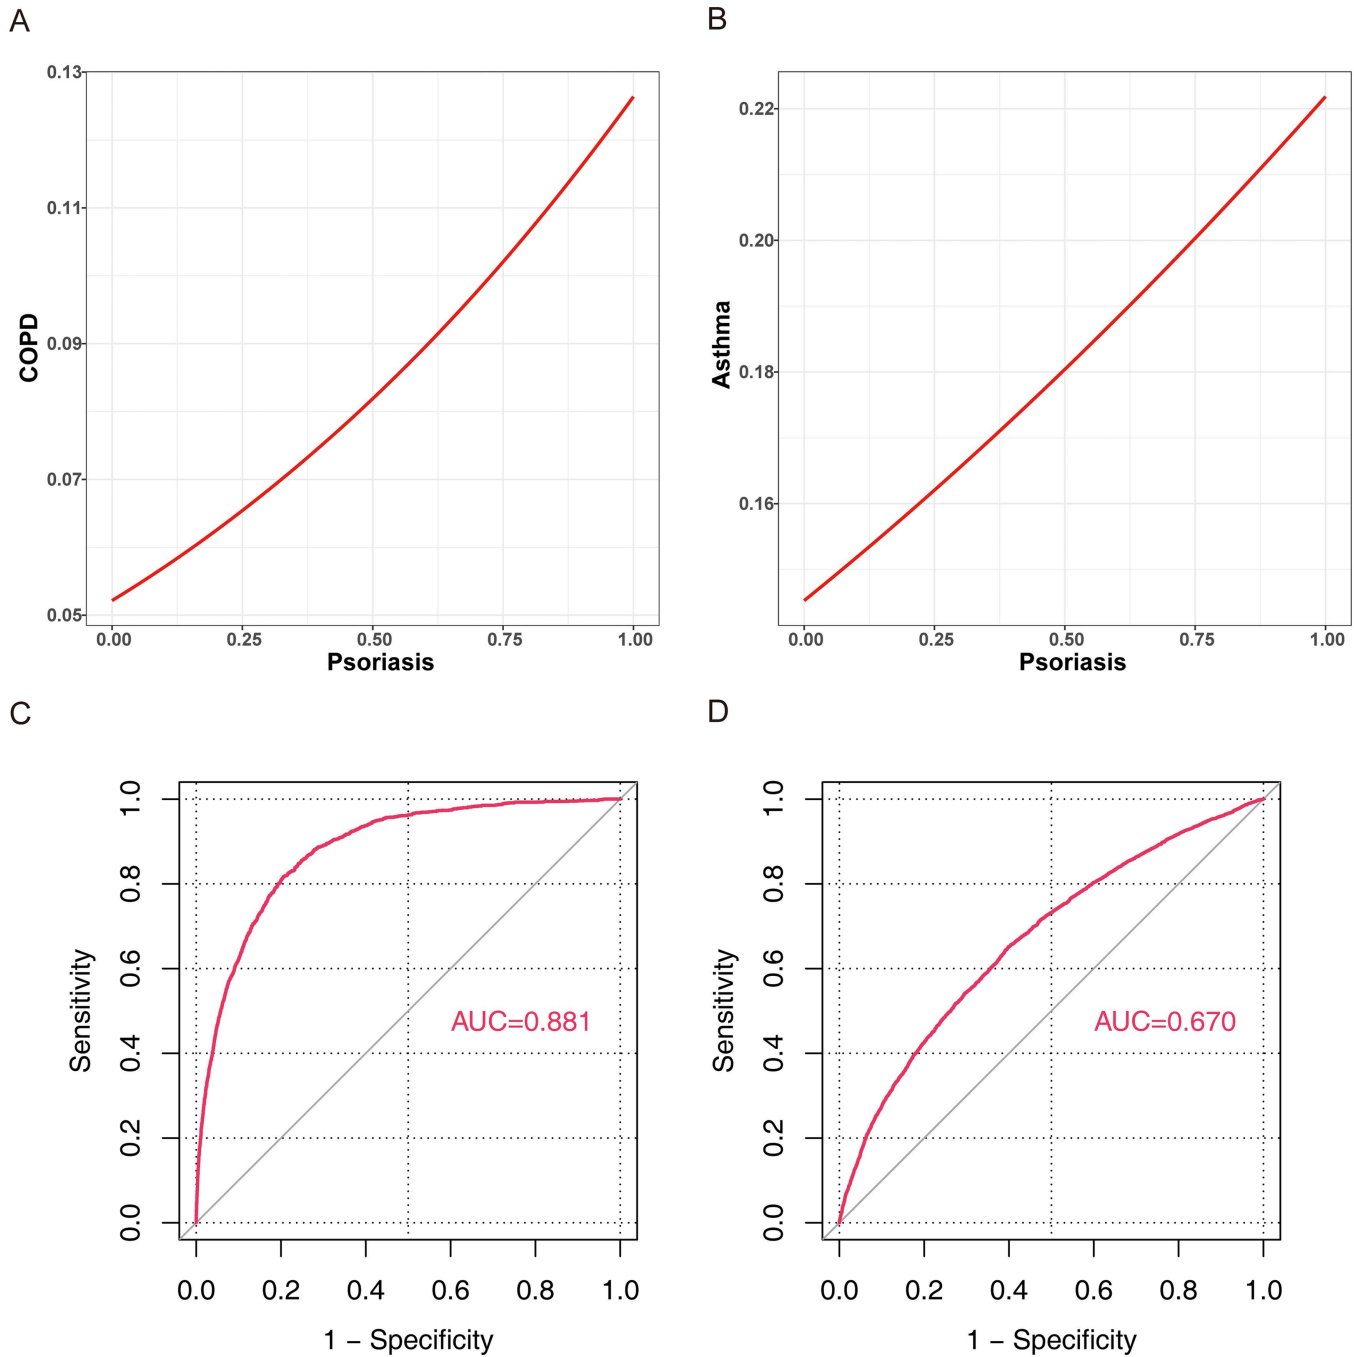

**Fig 3. Correlation analysis of COPD, AS, and psoriasis: (A) correlation between psoriasis and COPD, (B) correlation between psoriasis and AS, (C) ROC curve of Model 3 for predicting COPD, and (D) ROC curve of Model 3 for predicting AS.**

<https://doi.org/10.1371/journal.pone.0342015.g003>

#### 4. Discussion

COPD and AS are prevalent chronic diseases, and as the population grows, the number of individuals affected by these conditions continues to rise. Wu et al., in a meta-analysis, identified psoriasis as a risk factor for COPD [16]. Furthermore,

Mateusz et al. demonstrated that childhood AS increases the likelihood of developing psoriasis [19]. Therefore, the aim of this study was to analyze data on COPD, AS, and related variables from the NHIS database. The data were filtered based on the baseline table, and a multivariate logistic regression model was developed to explore the influencing factors for both COPD and AS. The objective was to offer new insights and concepts for the prevention and treatment of these diseases.

After adjusting for multiple confounding factors including age, ethnicity, smoking status, and comorbidities, this study still observed a strong association between psoriasis and COPD. The ROC curve suggests the predictive power of psoriasis for COPD, suggesting that the two may be associated through underlying pathophysiological mechanisms. According to previous studies, the association between psoriasis and COPD may be achieved through inflammation. Psoriasis patients have abnormal proliferation and differentiation of skin keratinocytes, and recruited immune cells produce pro-inflammatory cytokines, which can reach the lungs through blood circulation [20]. Meanwhile, chronic inflammation characterized by immune cell infiltration also exists in the lungs of COPD patients [21–23]. In addition, the prevalence of COPD in psoriasis patients is higher than that in the general population, and the risk of COPD increases with the severity of psoriasis [24]. The correlation analysis of this study showed a positive correlation between psoriasis and COPD. Therefore, psoriasis may to some extent promote changes in the pathological characteristics of COPD, and at the same time, the two diseases may have common risk factors or pathophysiological basis, thereby exhibiting a comorbidity tendency. This potential interaction pathway provides a starting point for elucidating the pathological association between psoriasis and COPD, suggesting that psoriasis can be included as a risk assessment indicator for COPD. It provides a theoretical basis for the development of COPD related monitoring and intervention strategies to regulate inflammation in psoriasis patients. However, further validation of related hypotheses is still needed.

In terms of the association between psoriasis and asthma, this study confirms a significant correlation between the two. Based on existing research, it is speculated that this association may be manifested through the synergistic effect of genetic susceptibility (such as sharing human leukocyte antigen (HLA) system susceptibility genes [25]) and common inflammatory pathways (both dominated by Th17 cell responses and sharing key inflammatory molecules such as IL-17 and IL-23 [26]). Specifically, the sustained release of pro-inflammatory cytokines in psoriasis patients can reach the lungs through blood circulation, exacerbating airway barrier damage, recruiting inflammatory cells, and inducing airway hyper-responsiveness [4,27], suggesting that it may affect the occurrence and development of asthma. However, ROC analysis shows that psoriasis has a good predictive power for COPD, but relatively poor predictive power for asthma. This difference may be due to the closer interaction between the chronic inflammatory pathways of psoriasis and COPD, and the more predictable progression of COPD inflammation related lung function damage [9,28]; The onset of asthma is influenced by multiple factors such as environmental allergens [3], which weakens the synergistic predictive effect of psoriasis and covariates. This difference indicates that psoriasis has disease-specific predictive value for chronic airway diseases, which can provide differentiated references for clinical risk stratification and early screening of COPD and asthma.

This study indicates that, in addition to psoriasis, multiple factors including age, ethnicity, geographic region, gender, educational attainment, marital status, employment status, income, smoking history, health status, and psychological state are associated with COPD and asthma. Among these, smoking and anxiety/depression are classic risk factors for COPD and asthma. Specifically, smoking induces increased neutrophil infiltration and heightened mucus secretion in airway epithelial cells of COPD patients, accelerating airway remodeling and irreversible airflow limitation [29]. For asthma, smoking may compromise the integrity of the airway mucosal barrier, increasing the likelihood of sensitization to external allergens [30]. The impact of adverse psychological states such as anxiety and depression on COPD and asthma primarily manifests at the neuroendocrine level. Prolonged anxiety and depression activate the hypothalamic-pituitary-adrenal (HPA) axis and sympathetic nervous system, leading to abnormal cortisol secretion rhythms [31,32], thereby weakening the body's ability to suppress chronic inflammation and indirectly promoting the progression of both diseases [33]. Although this study confirmed the association between psoriasis and COPD-asthma after adjusting for these covariates,

the presence of moderating factors such as smoking and psychological status in the COPD-asthma association suggests that these factors may interact with psoriasis. Based on the above findings, more targeted population management plans can be developed in clinical practice. Firstly, it is recommended to include early screening for COPD and asthma in the routine follow-up pathway for psoriasis patients, especially those with moderate to severe psoriasis. Regular testing of lung ventilation function and bronchial provocation or relaxation tests should be conducted to initiate early management of respiratory comorbidities and achieve early intervention for comorbidities; Secondly, for patients diagnosed with comorbidities (psoriasis combined with COPD/asthma), a multidisciplinary team (MDT) follow-up model consisting of dermatology, respiratory medicine, psychology, and general practice will be established: dermatology will monitor changes in psoriasis condition and adjust anti-inflammatory treatment, respiratory medicine will dynamically evaluate lung function and airway inflammation, and stepwise optimize bronchodilators and/or inhaled hormone regimens, psychological medicine will screen and intervene in anxiety/depression states through scales, and general practice will manage patients' lifestyles (such as smoking cessation, nutrition, and vaccine guidance), and conduct regular multidisciplinary joint evaluations to ensure the integrity and coherence of treatment plans. Therefore, it is recommended that clinical management integrate the above risk factors into quantifiable intervention targets, block disease progression pathways through multidimensional risk regulation strategies, and achieve a full process management upgrade from "symptom control" to "trajectory rewriting".

This study investigated the association between psoriasis and COPD/AS using the 2023 NHIS database. Although core findings were validated through multiple regression models, risk stratification, and ROC analysis, three methodological limitations remain: First, the initial analysis did not employ a sampling design incorporating stratification, clustering, and sampling weights, potentially introducing bias in effect estimates and necessitating caution in extrapolating conclusions. Second, the NHIS database, designed to cover broad topics, offers limited response options per question, making it difficult to obtain detailed information on COPD and asthma diagnosis/treatment or disease subtype data, thus failing to meet the requirements for in-depth research. Thirdly, the outcome measures of this study are based on retrospective data of 'previously diagnosed', which cannot clearly determine the chronological order of psoriasis with COPD and AS, and there is a limitation of lack of temporal correlation. Therefore, the results of this study reveal a disease association rather than causal effects. To address these limitations, future efforts will advance in three directions: First, incorporate NHIS sampling weights, stratification, and cluster identifiers into statistical models to correct for sampling design bias. Second, integrate structured clinical indicators from electronic health record (EHR) systems, such as pulmonary function test results and acute exacerbation hospitalization records. Concurrently, a multicenter prospective cohort study will be conducted to systematically collect serum inflammatory markers (e.g., IL-17, IL-23) and respiratory microbiome data. This dual approach of methodological correction and data supplementation will enhance result reliability, providing more rigorous evidence-based support for elucidating the association mechanisms between psoriasis and chronic airway diseases, as well as enabling precise risk stratification. Finally, regarding the causal relationship between exposure and outcome, prospective cohort studies or Mendelian randomization designs were used to further validate its directionality.

## 5. Conclusion

This study, based on the 2023 NHIS database, employed methods such as multivariate logistic regression to investigate the association between psoriasis and COPD/AS, as well as its predictive value. It confirmed a strong correlation between psoriasis and both COPD and AS, demonstrating good predictive efficacy for COPD. Additionally, it clarified that factors such as age, smoking, and hypertension are associated with both airway diseases. This study not only addresses the limitations of previous research focusing on the association between psoriasis and a single airway disease but also provides potential evidence-based support for screening and precision management of comorbid risks in chronic airway diseases. It further lays the groundwork for subsequent exploration of common mechanisms among the three conditions and the development of cross-disease intervention strategies. However, the study is constrained by limitations in the NHIS

database information. Future research should incorporate structured clinical indicators from electronic health records or conduct multicenter prospective studies for further validation.

## Supporting information

### S1 Table. Variable and its numbering information table.

(DOCX)

### S2 Table. Results of multicollinearity analysis.

(XLSX)

**S1 Fig. (A) Bar chart of missing rates for each variable, showing the distribution of missing data proportions across 27 key variables.** The bar chart is ordered by missing rate from lowest to highest, intuitively presenting the data completeness of each variable. The specific missing percentage of each variable is labeled with numbers on the right side. (B) Statistical power plots for asthma data: the upper left subplot represents the statistical power distribution, the upper right subplot is a scatter plot showing the relationship between odds ratios (OR) and statistical power, and the lower subplot is a bar chart of the average statistical power for each effect. (C) Statistical power plots for COPD data. (TIF)

## Acknowledgments

We sincerely acknowledge all individuals and organizations that have provided support and assistance throughout the entire process of this study. We would like to give special thanks to the members of the research team who have made core contributions to the study design, data collation, statistical analysis, and manuscript writing of this research. Specifically, they include Mingyu Liu, Pengxin Ye, Min Gong, and Qilin Liu from the Department of Equipment, West China Hospital of Sichuan University, as well as Shuming Ji from the Department of Clinical Research Management, West China Hospital of Sichuan University. Among them, Qilin Liu serves as the corresponding author (principal contact person) of this research team. For further communication regarding the research content, you may contact him via his email address: [hxlql@wchscu.cn](mailto:hxlql@wchscu.cn) or telephone number: +8618980601114. Finally, we extend our sincere gratitude to all individuals who have provided data support, technical guidance, and other forms of assistance for this study; this research would not have been possible without your support.

## Author contributions

**Conceptualization:** Min Gong.

**Data curation:** Mingyu Liu, Qilin Liu.

**Supervision:** Min Gong.

**Validation:** Mingyu Liu, Qilin Liu, Shuming Ji.

**Visualization:** Mingyu Liu, Qilin Liu, Pengxin Ye.

**Writing – original draft:** Mingyu Liu.

**Writing – review & editing:** Mingyu Liu, Qilin Liu, Shuming Ji, Pengxin Ye, Min Gong.

## References

1. Ferrera MC, Labaki WW, Han MK. Advances in Chronic Obstructive Pulmonary Disease. *Annu Rev Med.* 2021;72:119–34. <https://doi.org/10.1146/annurev-med-080919-112707> PMID: [33502902](https://pubmed.ncbi.nlm.nih.gov/33502902/)
2. Christenson SA, Smith BM, Bafadhel M, Putcha N. Chronic obstructive pulmonary disease. *Lancet.* 2022;399(10342):2227–42. [https://doi.org/10.1016/S0140-6736\(22\)00470-6](https://doi.org/10.1016/S0140-6736(22)00470-6) PMID: [35533707](https://pubmed.ncbi.nlm.nih.gov/35533707/)

3. Wan R, Srikaram P, Guntupalli V, Hu C, Chen Q, Gao P. Cellular senescence in asthma: from pathogenesis to therapeutic challenges. *EBioMedicine*. 2023;94:104717. <https://doi.org/10.1016/j.ebiom.2023.104717> PMID: [37442061](https://pubmed.ncbi.nlm.nih.gov/37442061/)
4. Ota VK, Oliveira AM, Bugiga AVG, Conceição HB, Galante PAF, Asprino PF, et al. Impact of life adversity and gene expression on psychiatric symptoms in children and adolescents: findings from the Brazilian high risk cohort study. *Front Psychiatry*. 2025;16:1505421. <https://doi.org/10.3389/fpsy.2025.1505421> PMID: [40018685](https://pubmed.ncbi.nlm.nih.gov/40018685/)
5. Iftikhar IH, Schimmel M, Sardi A, Mehta I, Gonzalez E, Musani AI. Bronchoscopic Lung Volume Reduction with Valves and Coils. A Network Meta-analysis. *Ann Am Thorac Soc*. 2020;17(11):1468–75. <https://doi.org/10.1513/AnnalsATS.202002-151OC> PMID: [32574516](https://pubmed.ncbi.nlm.nih.gov/32574516/)
6. Papi A, Blasi F, Canonica GW, Morandi L, Richeldi L, Rossi A. Treatment strategies for asthma: reshaping the concept of asthma management. *Allergy Asthma Clin Immunol*. 2020;16:75. <https://doi.org/10.1186/s13223-020-00472-8> PMID: [32944030](https://pubmed.ncbi.nlm.nih.gov/32944030/)
7. Krishnan JA, Nibber A, Chisholm A, Price D, Bateman ED, Bjermer L, et al. Prevalence and Characteristics of Asthma-Chronic Obstructive Pulmonary Disease Overlap in Routine Primary Care Practices. *Ann Am Thorac Soc*. 2019;16(9):1143–50. <https://doi.org/10.1513/AnnalsATS.201809-607OC> PMID: [31162945](https://pubmed.ncbi.nlm.nih.gov/31162945/)
8. Qu Y, Li D, Xiong H, Shi D. Transcriptional regulation on effector T cells in the pathogenesis of psoriasis. *Eur J Med Res*. 2023;28(1). <https://doi.org/10.1186/s40001-023-01144-0>
9. Agarwal AR, Kadam S, Brahme A, Agrawal M, Apte K, Narke G, et al. Systemic Immuno-metabolic alterations in chronic obstructive pulmonary disease (COPD). *Respir Res*. 2019;20(1):171. <https://doi.org/10.1186/s12931-019-1139-2> PMID: [31362724](https://pubmed.ncbi.nlm.nih.gov/31362724/)
10. Santos RVC, Cunha EGC, de Mello GSV, Rizzo JÁ, de Oliveira JF, do Carmo Alves de Lima M, et al. New Oxazolidinones Inhibit the Secretion of IFN- $\gamma$  and IL-17 by PBMCs from Moderate to Severe Asthmatic Patients. *Med Chem*. 2021;17(3):289–97. <https://doi.org/10.2174/1573406416666200910151950> PMID: [32914717](https://pubmed.ncbi.nlm.nih.gov/32914717/)
11. Martin A, Thatiparthi A, Liu J, Ge S, Egeberg A, Wu JJ. Association between psoriasis and asthma among United States adults in the 2009-2014 National Health and Nutrition Examination Survey. *J Am Acad Dermatol*. 2022;86(3):709–12. <https://doi.org/10.1016/j.jaad.2021.04.027> PMID: [33882277](https://pubmed.ncbi.nlm.nih.gov/33882277/)
12. Syamlal G, Dodd KE, Mazurek JM. Asthma, chronic obstructive pulmonary disease, and asthma-COPD overlap among US working adults. *J Asthma*. 2023;60(4):718–26. <https://doi.org/10.1080/02770903.2022.2089997> PMID: [35696621](https://pubmed.ncbi.nlm.nih.gov/35696621/)
13. Nagarajan S, Rosenbaum J, Joks R. The Relationship Between Allergic Rhinitis, Asthma, and Cardiovascular Disease in the National Health Interview Surveys (NHIS), 1999-2018. *J Allergy Clin Immunol Pract*. 2024;12(6):1509-1519.e4. <https://doi.org/10.1016/j.jaip.2024.02.001> PMID: [38341139](https://pubmed.ncbi.nlm.nih.gov/38341139/)
14. Jiang H, Li Y, Wang T. Comparison of Billroth I, Billroth II, and Roux-en-Y reconstructions following distal gastrectomy: A systematic review and network meta-analysis. *Cir Esp (Engl Ed)*. 2021;99(6):412–20. <https://doi.org/10.1016/j.cireng.2020.09.018> PMID: [34130813](https://pubmed.ncbi.nlm.nih.gov/34130813/)
15. DiKun KM, Tang X-H, Fu L, Choi ME, Lu C, Gudas LJ. Retinoic acid receptor  $\alpha$  activity in proximal tubules prevents kidney injury and fibrosis. *Proc Natl Acad Sci U S A*. 2024;121(7):e2311803121. <https://doi.org/10.1073/pnas.2311803121> PMID: [38330015](https://pubmed.ncbi.nlm.nih.gov/38330015/)
16. Wu D, Zhou X, Wu F, Cai R, Liu J, Bai Y. Association between psoriasis and asthma: a systematic review and bidirectional meta-analysis. *BMC Pulm Med*. 2024;24(1):293. <https://doi.org/10.1186/s12890-024-03078-7> PMID: [38914981](https://pubmed.ncbi.nlm.nih.gov/38914981/)
17. Panos A, Mavridis D. TableOne: an online web application and R package for summarising and visualising data. *Evid Based Ment Health*. 2020;23(3):127–30. <https://doi.org/10.1136/ebmental-2020-300162> PMID: [32665250](https://pubmed.ncbi.nlm.nih.gov/32665250/)
18. Møller PL, Rohde PD, Dahl JN, Rasmussen LD, Nissen L, Schmidt SE, et al. Predicting the presence of coronary plaques featuring high-risk characteristics using polygenic risk scores and targeted proteomics in patients with suspected coronary artery disease. *Genome Med*. 2024;16(1):40. <https://doi.org/10.1186/s13073-024-01313-8> PMID: [38509622](https://pubmed.ncbi.nlm.nih.gov/38509622/)
19. Mleczo M, Gerkowicz A, Krasowska D. Co-Occurrence of Psoriasis and Asthma in the Pediatric Population: A Systematic Review and Meta-Analysis. *J Clin Med*. 2024;13(22):6991. <https://doi.org/10.3390/jcm13226991> PMID: [39598135](https://pubmed.ncbi.nlm.nih.gov/39598135/)
20. Nagarajan S, Rosenbaum J, Joks R. The Relationship Between Allergic Rhinitis, Asthma, and Cardiovascular Disease in the National Health Interview Surveys (NHIS), 1999-2018. *J Allergy Clin Immunol Pract*. 2024;12(6):1509-1519.e4. <https://doi.org/10.1016/j.jaip.2024.02.001> PMID: [38341139](https://pubmed.ncbi.nlm.nih.gov/38341139/)
21. Upadhyay P, Wu C-W, Pham A, Zeki AA, Royer CM, Kodavanti UP, et al. Animal models and mechanisms of tobacco smoke-induced chronic obstructive pulmonary disease (COPD). *J Toxicol Environ Health B Crit Rev*. 2023;26(5):275–305. <https://doi.org/10.1080/10937404.2023.2208886> PMID: [37183431](https://pubmed.ncbi.nlm.nih.gov/37183431/)
22. Hoshino H, Laan M, Sjöstrand M, Lötvall J, Skoogh BE, Linden A. Increased elastase and myeloperoxidase activity associated with neutrophil recruitment by IL-17 in airways in vivo. *J Allergy Clin Immunol*. 2000;105(1 Pt 1):143–9. [https://doi.org/10.1016/s0091-6749\(00\)90189-1](https://doi.org/10.1016/s0091-6749(00)90189-1) PMID: [10629464](https://pubmed.ncbi.nlm.nih.gov/10629464/)
23. Yao L, Tang Y, Chen J, Li J, Wang H, Lu M, et al. Impaired airway epithelial barrier integrity was mediated by PI3K $\delta$  in a mouse model of lipopolysaccharide-induced acute lung injury. *Int Immunopharmacol*. 2021;95:107570. <https://doi.org/10.1016/j.intimp.2021.107570> PMID: [33773208](https://pubmed.ncbi.nlm.nih.gov/33773208/)
24. Guo L, Bilimoria SN, Kikuchi R, Hao A, Tolson H, Yamamoto RK, et al. Prevalence, incidence, and risk of chronic obstructive pulmonary disease among psoriasis patients. *Respir Med*. 2024;231:107729. <https://doi.org/10.1016/j.rmed.2024.107729> PMID: [38964424](https://pubmed.ncbi.nlm.nih.gov/38964424/)

25. Taherian MR, Fatemian F, Halimi A, Soleimani Y, Jorjani G, Nozari P, et al. Prevalence of asthma among children and adolescents in WHO's Eastern Mediterranean Region: a meta-analysis of over 0.5 million participants. *BMC Public Health*. 2024;24(1). <https://doi.org/10.1186/s12889-024-18716-2>
26. Chen Z, Shang Y, Yuan Y, He Y, Wasti B, Duan W, et al. MBD2 mediates Th17 cell differentiation by regulating MINK1 in Th17-dominant asthma. *Front Genet*. 2022;13:959059. <https://doi.org/10.3389/fgene.2022.959059> PMID: [36303542](https://pubmed.ncbi.nlm.nih.gov/36303542/)
27. Alnahas S, Hagner S, Raifer H, Kilic A, Gasteiger G, Mutters R, et al. IL-17 and TNF- $\alpha$  Are Key Mediators of *Moraxella catarrhalis* Triggered Exacerbation of Allergic Airway Inflammation. *Front Immunol*. 2017;8:1562. <https://doi.org/10.3389/fimmu.2017.01562> PMID: [29184554](https://pubmed.ncbi.nlm.nih.gov/29184554/)
28. Shvaiko LI, Bazyka KD, Shilenko MV, Savchenko AA, Tkachuk NA. Patterns of development of clinical and functional disorders of the bronchopulmonary system in the post-accident period in persons exposed to ionizing radiation. *Probl Radiac Med Radiobiol*. 2024;(29):425–34. <https://doi.org/10.33145/2304-8336-2024-29-425-434> PMID: [39724631](https://pubmed.ncbi.nlm.nih.gov/39724631/)
29. Xu X, Huang K, Dong F, Qumu S, Zhao Q, Niu H, et al. The Heterogeneity of Inflammatory Response and Emphysema in Chronic Obstructive Pulmonary Disease. *Front Physiol*. 2021;12:783396. <https://doi.org/10.3389/fphys.2021.783396> PMID: [34950055](https://pubmed.ncbi.nlm.nih.gov/34950055/)
30. Bellou V, Gogali A, Kostikas K. Asthma and Tobacco Smoking. *J Pers Med*. 2022;12(8):1231. <https://doi.org/10.3390/jpm12081231> PMID: [36013180](https://pubmed.ncbi.nlm.nih.gov/36013180/)
31. Duprey EB, Oshri A, Liu S, Kogan SM, Caughy MO. Physiological Stress Response Reactivity Mediates the Link Between Emotional Abuse and Youth Internalizing Problems. *Child Psychiatry Hum Dev*. 2021;52(3):450–63. <https://doi.org/10.1007/s10578-020-01033-1> PMID: [32720015](https://pubmed.ncbi.nlm.nih.gov/32720015/)
32. Jones EJ, Rohleder N, Schreier HMC. Neuroendocrine coordination and youth behavior problems: A review of studies assessing sympathetic nervous system and hypothalamic-pituitary adrenal axis activity using salivary alpha amylase and salivary cortisol. *Horm Behav*. 2020;122:104750. <https://doi.org/10.1016/j.yhbeh.2020.104750> PMID: [32302595](https://pubmed.ncbi.nlm.nih.gov/32302595/)
33. Knezevic E, Nenic K, Milanovic V, Knezevic NN. The Role of Cortisol in Chronic Stress, Neurodegenerative Diseases, and Psychological Disorders. *Cells*. 2023;12(23):2726. <https://doi.org/10.3390/cells12232726> PMID: [38067154](https://pubmed.ncbi.nlm.nih.gov/38067154/)
